# Supplementary material for: A Study on the Cross-Entropy Method for Rare-Event Probability Estimation
Source: Atypon-hosted journal article supplement (doi:10.1287/ijoc.1060.0176), 2007-08-01
Supplement: ijoc.1060.0176-sm-homem-de-mello.pdf [file ijoc.1060.0176-sm-homem-de-mello.pdf]

Online Supplement to  
 “A Study on the Cross-Entropy Method for Rare-Event  
 Probability Estimation”

*INFORMS Journal on Computing*

Tito Homem-de-Mello

Department of Industrial Engineering and Management Sciences, Northwestern University, Evanston,  
 Illinois 60208, USA, tito@northwestern.edu

**Proof of Proposition 3.** Let  $L_p$  be an arbitrary path. As mentioned in the paper,  $L_p$  consists of  $S$  vertical arcs and  $J - 1$  horizontal ones. Notice that the  $d$ th arc down in  $L_p$  corresponds to some random variable  $Y_{dj}$ . By the assumption that the random variables  $\{Y_{sj}\}_{j=1,\dots,J}$  are identically distributed, we have that

$$L_p \stackrel{d}{=} \sum_{s=1}^S Y_{s1} + \sum_{j=1}^{J-1} Y_{s_j j},$$

where  $s_1, \dots, s_{J-1}$  is some sequence of indices in  $\{1, \dots, S\}$  and  $\stackrel{d}{=}$  denotes equality in distribution. Now, the assumption of stochastic dominance implies that

$$L_p \leq_{st} \sum_{s=1}^S Y_{s1} + \sum_{j=1}^{J-1} Y_{s_{max} j}. \quad (\text{A-1})$$

Finally, let  $L_{p_{max}}$  denote the path constructed in the following way: go down  $s_{max} - 1$  arcs, then go right  $J - 1$  arcs, and then go down  $S + 1 - s_{max}$  arcs. Then,  $L_{p_{max}}$  is equal in distribution to the right-hand side of (A-1).

We shall prove next that (22) in the paper holds. Under the assumptions of the proposition, we have that  $L_p \leq_{st} L_{p_{max}}$  for all  $p = 1, \dots, T$ , i.e.,  $P(L_p \geq x) \leq P(L_{p_{max}} \geq x)$  for all  $p = 1, \dots, T$  and all  $x$ . Since  $C_{SJ} = \max_{p=1,\dots,T} L_p$  we have that  $P(C_{SJ} \geq x) \geq P(L_{p_{max}} \geq x)$ . Moreover,

$$P(C_{SJ} \geq x) = 1 - P(C_{SJ} < x) = 1 - P(L_p < x, p = 1, \dots, T). \quad (\text{A-2})$$

Using Bonferroni’s inequality, we have

$$P(L_p < x, p = 1, \dots, T) \geq 1 - \sum_{p=1}^T P(L_p \geq x).$$

By substituting the above expression into (A-2) and using the fact that  $P(L_p \geq x) \leq P(L_{p_{max}} \geq x)$  we obtain the bounds

$$P(L_{p_{max}} \geq x) \leq P(C_{SJ} \geq x) \leq T P(L_{p_{max}} \geq x).$$

A combinatorial argument shows that the total number of feasible paths is given by  $T = \binom{S+J-2}{J-1}$ .

The final assertion of the proposition follows immediately from the construction of  $L_{p_{max}}$ .

■

Table A-1: Progression of the Algorithm for the Discrete-Distribution Case,  $J = 4$ ,  $S = 3$ , Data Set as in Table 5 in the Paper

| $k$ | $\hat{\gamma}^k$ | $(s, j)$ | $\hat{p}_{sj,1}^k$ | $\hat{p}_{sj,2}^k$ | $\hat{p}_{sj,3}^k$ | $\hat{p}_{sj,4}^k$ |
|-----|------------------|----------|--------------------|--------------------|--------------------|--------------------|
| 1   | 216              | (1,1)    | 0.000              | 0.000              | 0.218              | 0.782              |
|     |                  | (2,1)    | 0.019              | 0.275              | 0.127              | 0.579              |
|     |                  | (3,1)    | 0.131              | 0.338              | 0.042              | 0.489              |
|     |                  | (1,2)    | 0.210              | 0.062              | 0.220              | 0.508              |
|     |                  | (2,2)    | 0.016              | 0.272              | 0.107              | 0.605              |
|     |                  | (3,2)    | 0.110              | 0.283              | 0.035              | 0.572              |
|     |                  | (1,3)    | 0.262              | 0.077              | 0.241              | 0.420              |
|     |                  | (2,3)    | 0.016              | 0.294              | 0.139              | 0.551              |
|     |                  | (3,3)    | 0.079              | 0.202              | 0.032              | 0.687              |
|     |                  | (1,4)    | 0.300              | 0.088              | 0.262              | 0.350              |
|     |                  | (2,4)    | 0.024              | 0.318              | 0.132              | 0.527              |
|     |                  | (3,4)    | 0.000              | 0.032              | 0.030              | 0.939              |
| 2   | 236              |          | ...                |                    |                    |                    |
| 3   | 237              | (1,1)    | 0.000              | 0.000              | 0.000              | 1.000              |
|     |                  | (2,1)    | 0.000              | 0.000              | 0.000              | 1.000              |
|     |                  | (3,1)    | 0.131              | 0.338              | 0.042              | 0.489              |
|     |                  | (1,2)    | 0.132              | 0.039              | 0.139              | 0.690              |
|     |                  | (2,2)    | 0.000              | 0.000              | 0.000              | 1.000              |
|     |                  | (3,2)    | 0.110              | 0.283              | 0.035              | 0.572              |
|     |                  | (1,3)    | 0.262              | 0.077              | 0.241              | 0.420              |
|     |                  | (2,3)    | 0.000              | 0.000              | 0.000              | 1.000              |
|     |                  | (3,3)    | 0.079              | 0.202              | 0.032              | 0.687              |
|     |                  | (1,4)    | 0.300              | 0.088              | 0.262              | 0.350              |
|     |                  | (2,4)    | 0.000              | 0.000              | 0.000              | 1.000              |
|     |                  | (3,4)    | 0.000              | 0.000              | 0.000              | 1.000              |
